# Supplementary material
Source: Springer Nature journal article supplement (https://www.springermedizin.de/resource/supplementary/12885_2013_3973_MOESM4_ESM.pdf/9464924)

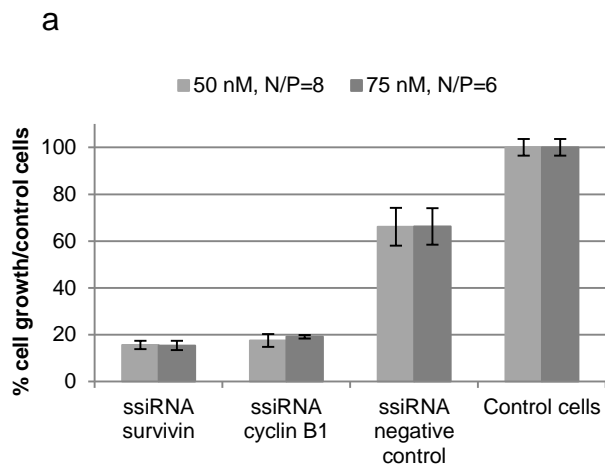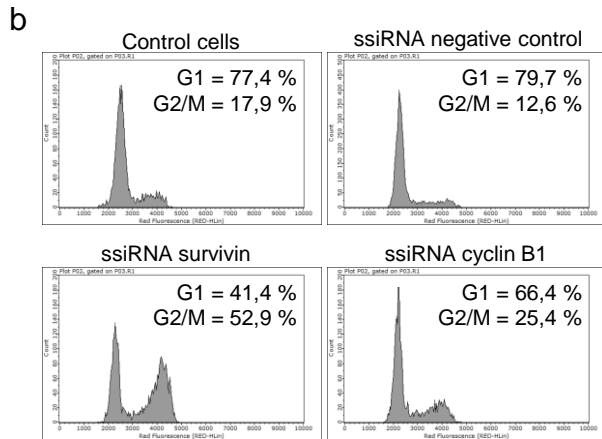

**c**

|                         | % Apoptotic cells |
|-------------------------|-------------------|
| Control cells           | 7.0 ± 2.44        |
| ssiRNA negative control | 7.1 ± 3.18        |
| ssiRNA survivin         | 18.4 ± 3.95       |
| ssiRNA cyclin B1        | 14.2 ± 4.88       |

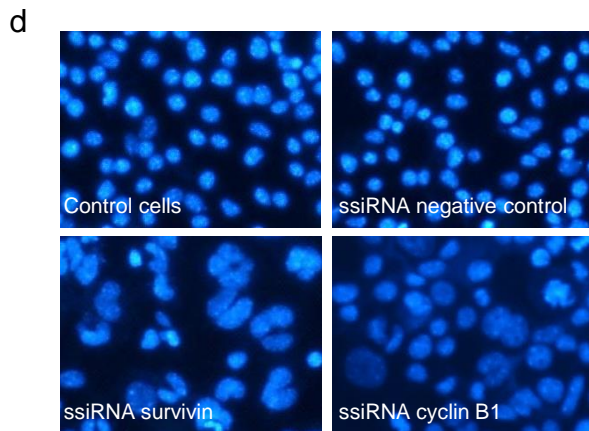

Supplement: MOESM4 [file 9464924]
